# Supplementary material for: An ether bridge between cations to extend the applicability of ionic liquids in electric double layer capacitors
Source: Royal Society of Chemistry journal article supplement (doi:10.1039/c6ta08203c), 2016-01-01
Supplement: c6ta08203c1.pdf [file c6ta08203c1.pdf]

Electronic Supplementary Information

**An Ether Bridge between Cations to Extend the Applicability of  
Ionic Liquid in Electric Double Layer Capacitors**

Hsin-Chieh Huang,<sup>a</sup> Yung-Che Yang,<sup>b</sup> Jui-Cheng Chang,<sup>c</sup> Ching-Wen Su,<sup>a</sup> Pei-Yi Chang,<sup>a</sup> I-Wen Sun,<sup>b</sup> Chien-Te Hsieh,<sup>d</sup> Yuh-Lang Lee,<sup>a</sup> and Hsisheng Teng<sup>a,\*</sup>

<sup>a</sup>Department of Chemical Engineering and Research Center for Energy Technology and Strategy, National Cheng Kung University, Tainan 70101, Taiwan

<sup>b</sup>Department of Chemistry, National Cheng Kung University, Tainan 70101,  
Taiwan

<sup>c</sup>Instrument Center, National Cheng Kung University, Tainan 70101, Taiwan

<sup>d</sup>Department of Chemical Engineering and Materials Science, Yuan Ze Fuel Cell Center, Yuan Ze University, Taoyuan 32023, Taiwan

\*To whom correspondence should be addressed. E-mail: [hteng@mail.ncku.edu.tw](mailto:hteng@mail.ncku.edu.tw),

Tel: 886-6-2385371, Fax: 886-6-2344496

**Electronic supplementary information for:**

1. <sup>1</sup>H NMR and <sup>13</sup>C NMR spectra of [C<sub>6</sub>O<sub>2</sub>(MIm)<sub>2</sub>]-TFSI<sub>2</sub> (Fig. S1)
2. The chemical structure of [C<sub>8</sub>(MIm)<sub>2</sub>]-TFSI<sub>2</sub> (Scheme S1)
3. FTIR spectra of the ILs (Fig. S2)
4. Raman spectra of the ILs (Fig. S3)
5. AC impedance Nyquist plots of the ILs for conductivity measurements (Fig. S4)
6. Linear scan voltammograms for determining the usable voltage ranges of the

**ILs (Fig. S5)**

**7. Pore size distribution of the aMP carbon (Table S1)**

**8. Cyclic voltammograms of the EMIm-TFSI and EM-di5 EDLCs measured at 60 °C (Fig. S6)**

**9. Capacitance values of the EMIm-TFSI and EM-di5 EDLCs measured at 60 °C (Fig. S7)**

# 1. $^1\text{H}$ NMR and $^{13}\text{C}$ NMR spectra of $[\text{C}_6\text{O}_2(\text{MIm})_2]\text{-TFSI}_2$

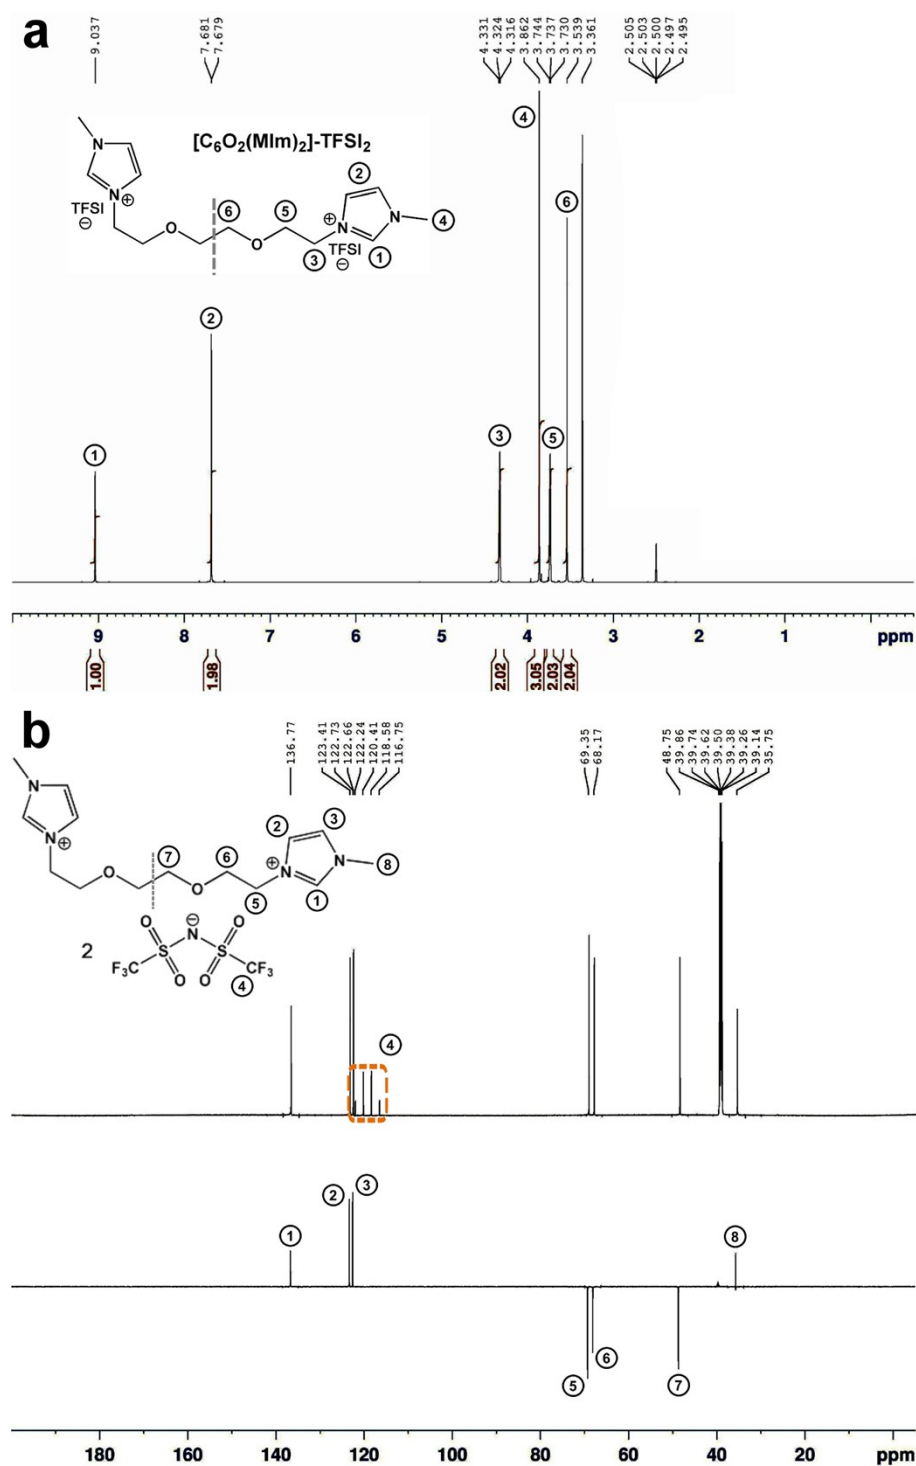

**Fig. S1.** The (a)  $^1\text{H}$  NMR and (b)  $^{13}\text{C}$  NMR spectra of  $[\text{C}_6\text{O}_2(\text{MIm})_2]\text{-TFSI}_2$  reveal the distinct types of hydrogen and carbon atoms in cation and anion. The numbers beside the NMR peaks correspond to the distinct hydrogen or carbon atoms in molecular structure.

## 2. The chemical structure of $[\text{C}_8(\text{MIm})_2]\text{-TFSI}_2$

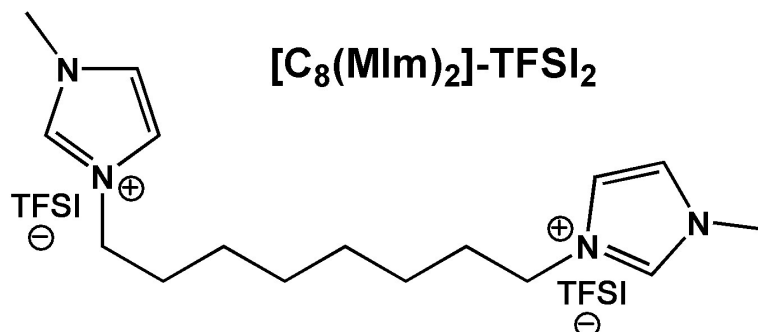

**Scheme S1.** Schematic illustration of the chemical structure of the  $[\text{C}_8(\text{MIm})_2]\text{-TFSI}_2$  DIL containing an ethylene-chain-bridge.

### 3. FTIR spectra of the ILs

Fig. S2a shows the full-range Fourier transform infrared (FTIR) spectra associated with EM-di0, EM-di5, and  $[\text{C}_6\text{O}_2(\text{MIm})_2]\text{-TFSI}_2$ . In the region between 650 and 900  $\text{cm}^{-1}$  (Fig. S2b), five strong bands were observed, and they were assigned to a S–N–S bending (652  $\text{cm}^{-1}$ ),  $\text{CF}_3$  symmetric bending (741  $\text{cm}^{-1}$ ), ring HCCH asymmetric bending (763  $\text{cm}^{-1}$ ), C–S stretching (791  $\text{cm}^{-1}$ ), and NC(H)N bending/CCH bending (837  $\text{cm}^{-1}$ ).<sup>35–37</sup> Other strong bands are shown in Fig. S2c, and they were assigned to a S–N–S asymmetric stretching, C–C stretching,  $\text{NCH}_3$  twisting (1053  $\text{cm}^{-1}$ ),  $\text{SO}_2$  symmetric stretching (1134  $\text{cm}^{-1}$ ) overlapping an asymmetric C–O–C stretching in an ether-bridged linker of  $[\text{C}_6\text{O}_2(\text{MIm})_2]\text{-TFSI}_2$  (1120  $\text{cm}^{-1}$ ),<sup>33</sup> and a  $\text{CH}_2(\text{N})/\text{CH}_3(\text{N})$  C–N stretching (1169  $\text{cm}^{-1}$ ). Between 1180 and 1350  $\text{cm}^{-1}$ , the anions dominated, particularly in terms of  $\text{CF}_3$  asymmetric stretching (1180 and 1198  $\text{cm}^{-1}$ ),  $\text{CF}_3$  symmetric stretching (1227  $\text{cm}^{-1}$ ), and two  $\text{SO}_2$  asymmetric stretching modes (1331 and 1350  $\text{cm}^{-1}$ ).<sup>35–37</sup> We noted that a ring in-plane  $\text{CH}_2(\text{N})/\text{CH}_3(\text{N})$  symmetric/asymmetric stretching mode involved wavenumber shifts (1575  $\text{cm}^{-1}$  for EMIM-TFSI, 1574  $\text{cm}^{-1}$  for EM-di5, and 1577  $\text{cm}^{-1}$  for  $[\text{C}_6\text{O}_2(\text{MIm})_2]\text{-TFSI}_2$ ), indicating that the vibration behavior of  $\text{CH}_2(\text{N})$  and  $\text{CH}_3(\text{N})$  in the imidazolium cations demonstrated the highest freedom in the movements of EM-di5. However, the linker exerted a greater constraint on  $[\text{C}_6\text{O}_2(\text{MIm})_2]\text{-TFSI}_2$  than on the MIL that was translated by the wavenumber shift to a higher value.<sup>38,39</sup> Fig. S2d (2800 to 3300  $\text{cm}^{-1}$ ) shows the C–H stretching band where  $[\text{C}_6\text{O}_2(\text{MIm})_2]\text{-TFSI}_2$  has a stronger intensity than that of EM-di0 because of the linker.<sup>36</sup>

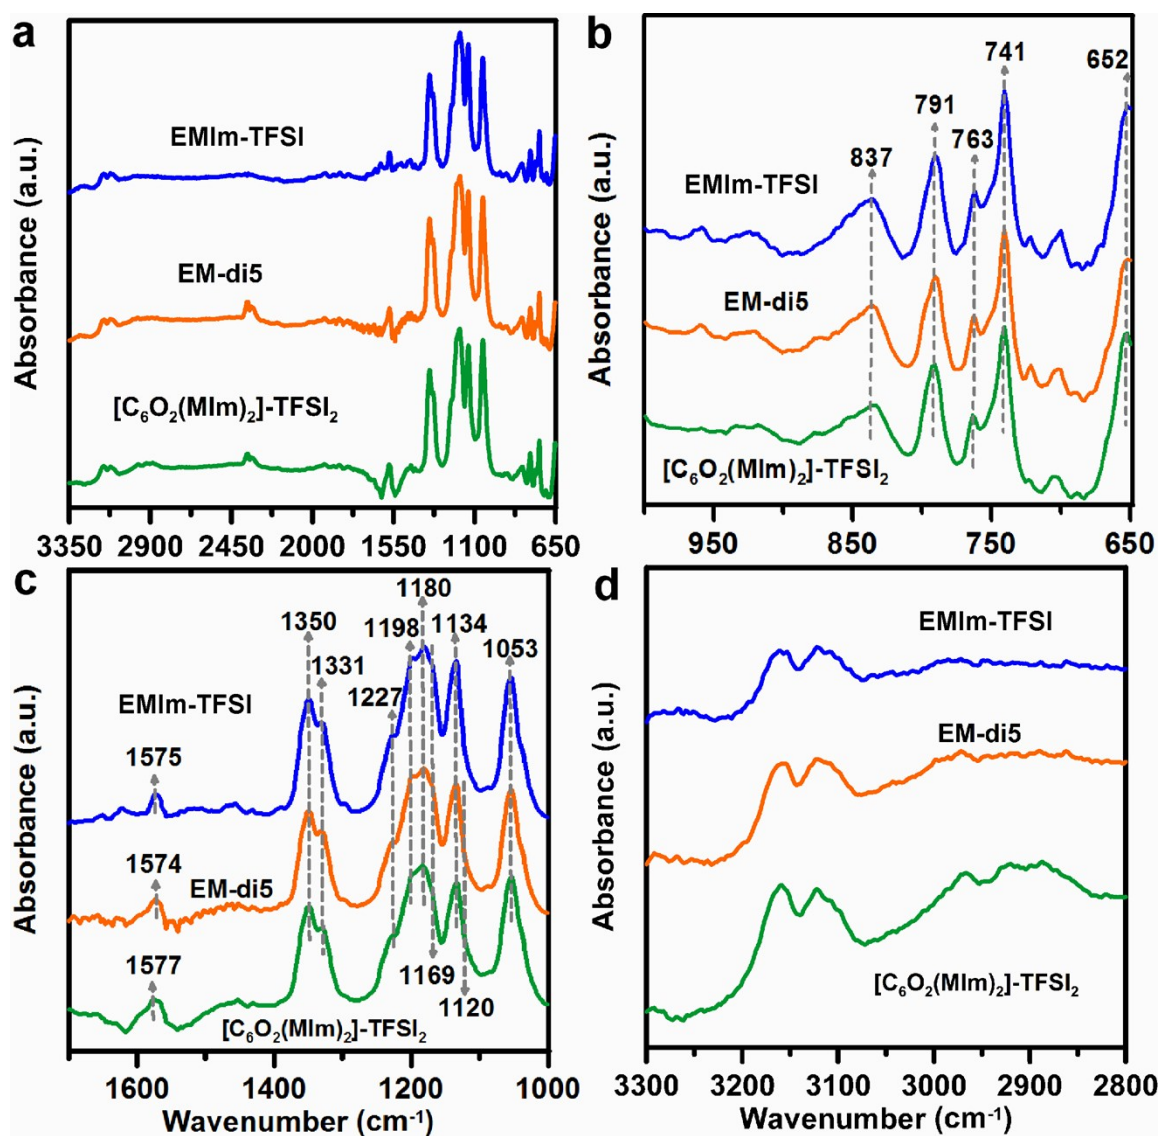

**Fig. S2.** The FTIR spectra of EMIm-TFSI, EM-di5, and  $[C_6O_2(MIm)_2]-TFSI_2$  in (a) the full spectral range 3350–650  $cm^{-1}$ , (b) the spectral range 1000–650  $cm^{-1}$ , (c) the spectral range 1700–1000  $cm^{-1}$ , and (d) the spectral range 3300–2800  $cm^{-1}$ .

#### 4. Raman spectra of the ILs

Fig. S3a shows the full-range Raman spectra of EMIm-TFSI, EM-di5, and  $[\text{C}_6\text{O}_2(\text{MIm})_2]\text{-TFSI}_2$ . The strongest signal was at  $742\text{ cm}^{-1}$ , and it was assigned to the  $\text{CF}_3$  symmetric stretching of the TFSI anion. Fig. S3b presents a  $\text{CF}_3$  symmetric bending ( $280\text{ cm}^{-1}$ ) and S–C stretching ( $314$ ,  $328$ , and  $340\text{ cm}^{-1}$ ). In addition, a signal of  $\text{CH}_2(\text{N})/\text{CH}_3(\text{N})$  C–H bending was located as  $[\text{C}_6\text{O}_2(\text{MIm})_2]\text{-TFSI}_2$  ( $407\text{ cm}^{-1}$ ) > EMIm-TFSI ( $403\text{ cm}^{-1}$ ) > EM-di5 ( $401\text{ cm}^{-1}$ ), signifying that the interionic interaction between the imidazolium cations and the TFSI anions of  $[\text{C}_6\text{O}_2(\text{MIm})_2]\text{-TFSI}_2$  was the strongest, whereas that of EM-di5 was the weakest.<sup>38,39</sup> The linker limited  $[\text{C}_6\text{O}_2(\text{MIm})_2]\text{-TFSI}_2$  mobility so that  $[\text{C}_6\text{O}_2(\text{MIm})_2]\text{-TFSI}_2$  had a high viscosity and high interionic and intermolecular interaction. By contrast, when a small amount of  $[\text{C}_6\text{O}_2(\text{MIm})_2]\text{-TFSI}_2$  was added to EMIm-TFSI, the interionic interaction between the cations and anions decreased. The same phenomenon was observed at a  $\text{CH}_2(\text{N})/\text{CH}_3(\text{N})$  C–N stretching mode:  $[\text{C}_6\text{O}_2(\text{MIm})_2]\text{-TFSI}_2$  ( $601\text{ cm}^{-1}$ ) > EM-di0 ( $599\text{ cm}^{-1}$ ) > EM-di5 ( $598\text{ cm}^{-1}$ ), as shown in Fig. S3b, and  $[\text{C}_6\text{O}_2(\text{MIm})_2]\text{-TFSI}_2$  ( $1575\text{ cm}^{-1}$ ) > EM-di0 ( $1573\text{ cm}^{-1}$ ) > EM-di5 ( $1570\text{ cm}^{-1}$ ), as shown in Fig. S3c; we also note another O=S=O asymmetric stretching mode:  $[\text{C}_6\text{O}_2(\text{MIm})_2]\text{-TFSI}_2$  ( $1341\text{ cm}^{-1}$ ) > EM-di0 ( $1337\text{ cm}^{-1}$ ) > EM-di5 ( $1336\text{ cm}^{-1}$ ).<sup>38,39</sup> Moreover, other strong Raman bands (Fig. S3c) were assigned to a C–F symmetric stretching ( $1025$  and  $1244\text{ cm}^{-1}$ ), C–C stretching (only for  $[\text{C}_6\text{O}_2(\text{MIm})_2]\text{-TFSI}_2$  at  $1038\text{ cm}^{-1}$ ),  $\text{SO}_2$  symmetric stretching ( $1138\text{ cm}^{-1}$ ), and  $\text{CH}_2(\text{N})/\text{CH}_3(\text{N})$  C–N stretching ( $1390$ ,  $1422$ , and  $1456\text{ cm}^{-1}$ ). Fig. S3d shows the C–H stretching region ( $2900$  to  $3000\text{ cm}^{-1}$ ) assigned to the vibration of the ethyl chain on the imidazolium cations in the same FTIR spectral zone.<sup>36</sup>

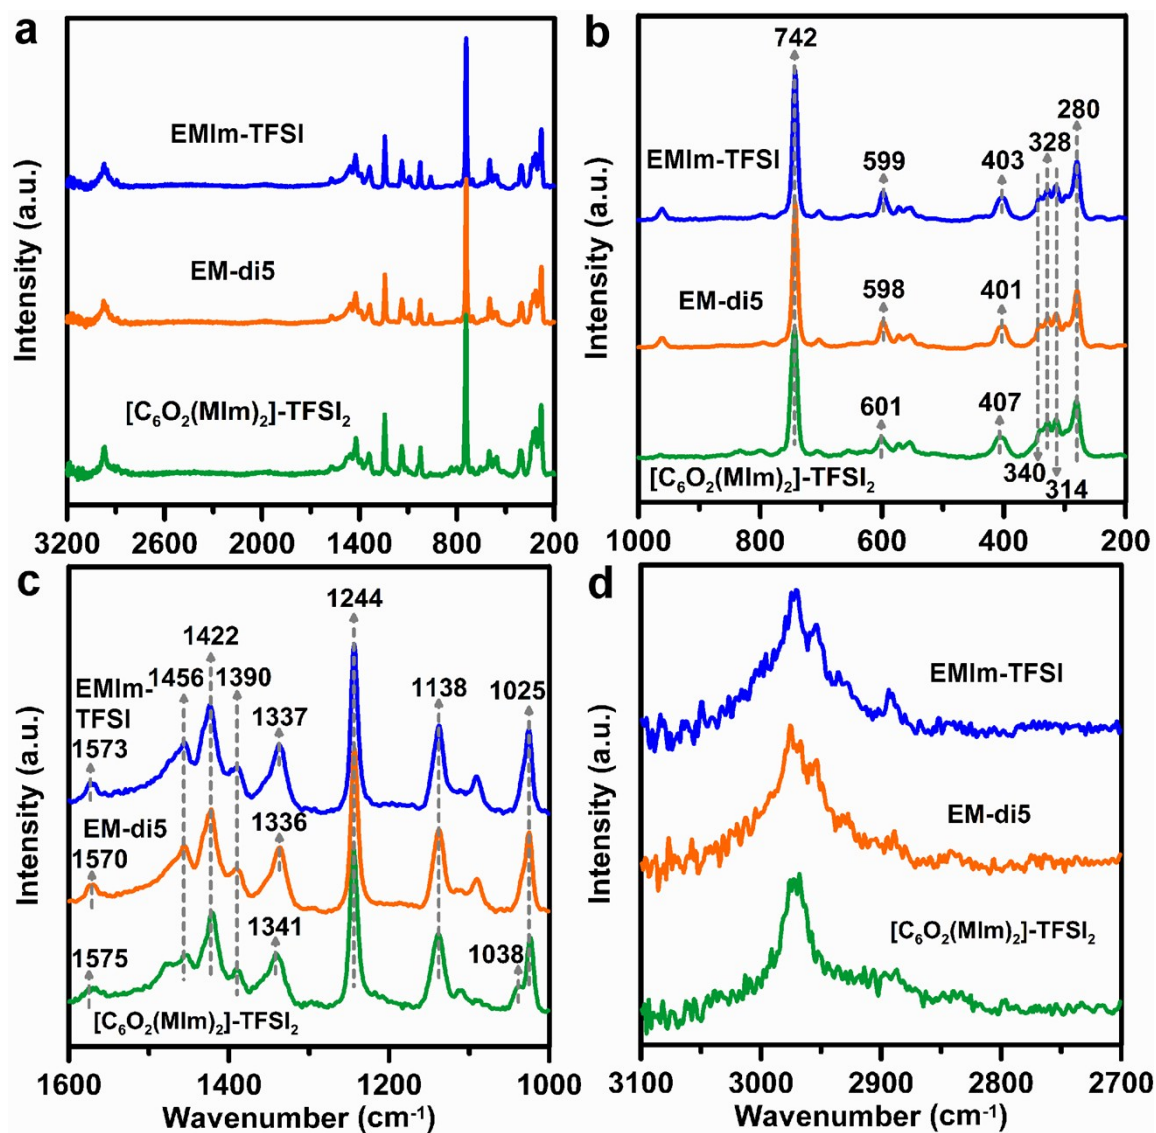

**Fig. S3.** The Raman spectra of EMIm-TFSI, EM-di5, and  $[C_6O_2(MIm)_2]-TFSI_2$  in (a) the full spectral range 3200–200  $cm^{-1}$ , (b) the spectral range 1000–200  $cm^{-1}$ , (c) the spectral range 1600–1000  $cm^{-1}$ , and (d) the spectral range 3100–2700  $cm^{-1}$ .

## 5. AC impedance Nyquist plots of the ILs for conductivity measurements

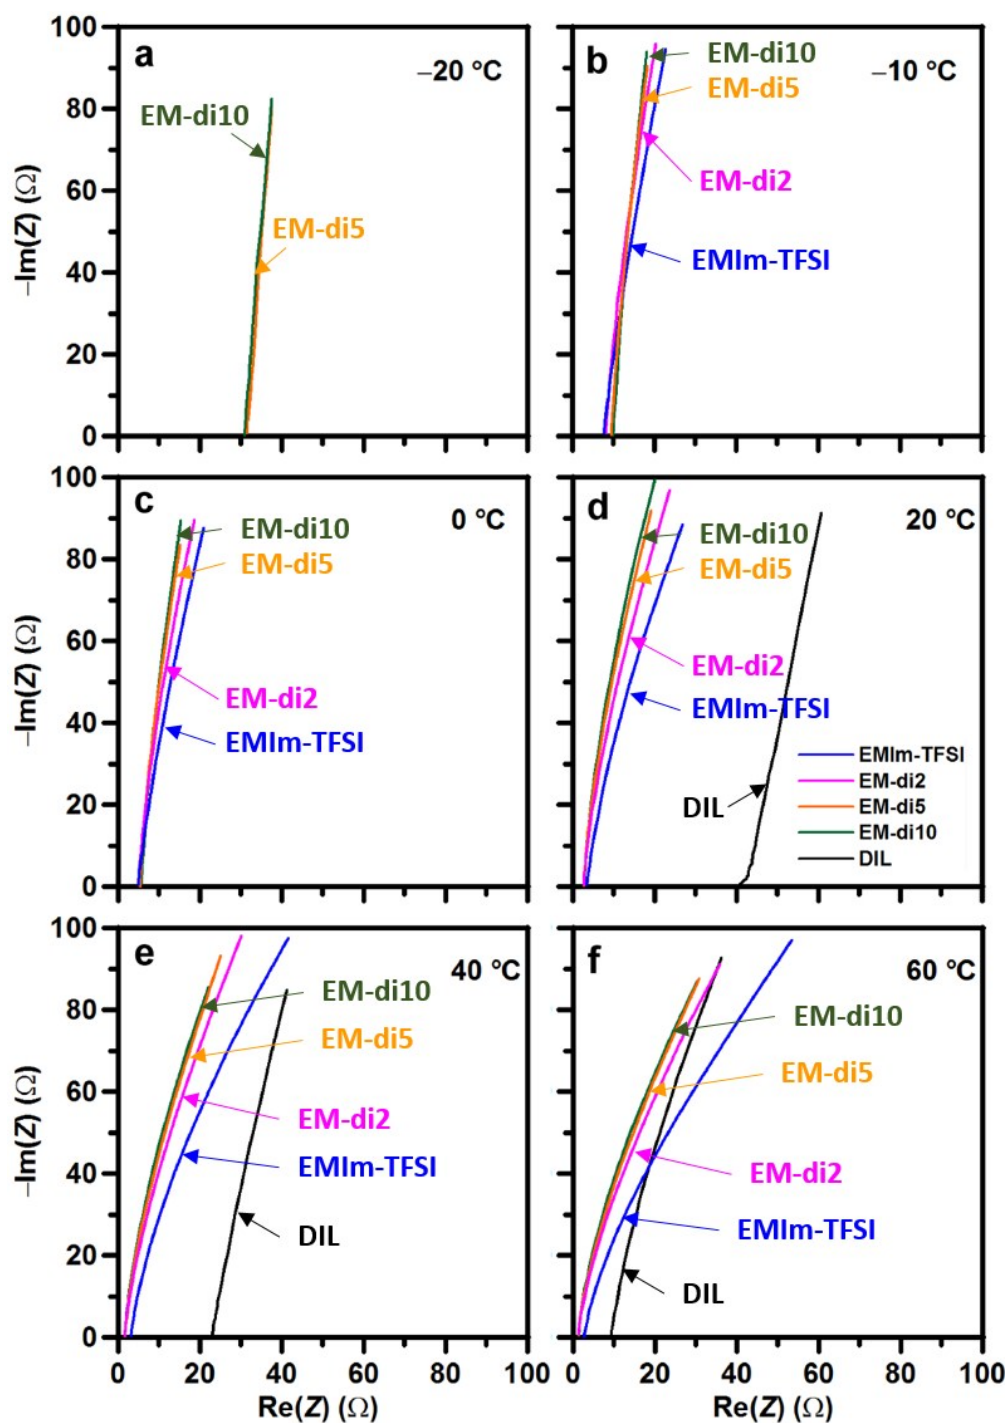

**Fig. S4.** Nyquist impedance plots of the IL electrolytes measured at temperatures of  $-20$  to  $60$   $^{\circ}\text{C}$  with an AC frequency range of  $0.1$  Hz to  $1$  MHz at  $0$  V. In the measurement, the electrolytes were soaked with a cellulose membrane that was then placed between two stainless steel foils of  $1\text{ cm}^2$ . The thickness of the cellulose membrane was  $30\text{ }\mu\text{m}$ .

## 6. Linear scan voltammograms for determining the usable voltage ranges of the ILs

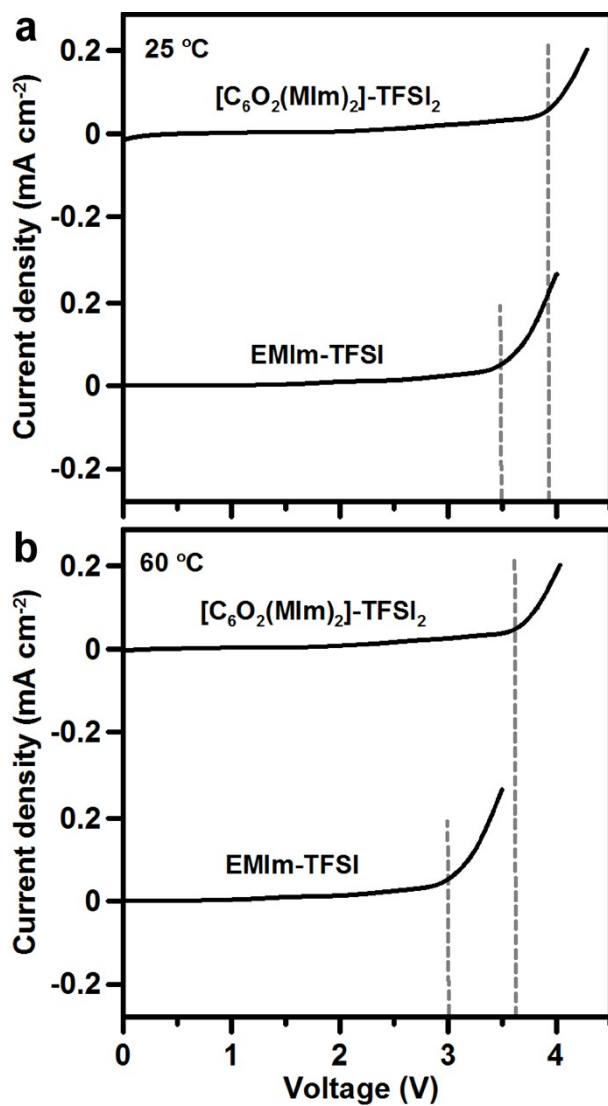

**Fig. S5.** The linear scan voltammograms of the EMIm-TFSI and [C<sub>6</sub>O<sub>2</sub>(MIm)<sub>2</sub>]-TFSI<sub>2</sub> cells used in the conductivity analysis (Fig. S4). The voltammograms were obtained at 25 and 60 °C by scanning from 0 V at a scan rate of 5 mV s<sup>-1</sup>.

## 7. Pore size distribution of the aMP carbon

**Table S1.** Pore structure of the aMP carbon.  $S_{\text{BET}}$  represents the surface area determined using the Brunauer–Emmett–Teller method,  $S_t$  and  $V_t$  the surface area and pore volume determined using the non-local density functional theory, and  $S_{\text{mi}}$  the micropore (0.58–2 nm) surface area determined using the non-local density functional theory.  $V_t$  is contributed by micropores (< 2 nm) and mesopores (2–100 nm), with the contribution percentages shown in the “Pore size distribution” column.

| Carbon | $S_{\text{BET}}$<br>( $\text{m}^2 \text{g}^{-1}$ ) | $S_t$<br>( $\text{m}^2 \text{g}^{-1}$ ) | $S_{\text{mi}}$<br>( $\text{m}^2 \text{g}^{-1}$ ) | $V_t$<br>( $\text{cm}^3 \text{g}^{-1}$ ) | Pore size distribution |          |
|--------|----------------------------------------------------|-----------------------------------------|---------------------------------------------------|------------------------------------------|------------------------|----------|
|        |                                                    |                                         |                                                   |                                          | Micro (%)              | Meso (%) |
| aMP    | 2700                                               | 1767                                    | 1400                                              | 1.46                                     | 63                     | 37       |

## 8. Cyclic voltammograms of the EMIm-TFSI and EM-di5 EDLCs measured at 60 °C

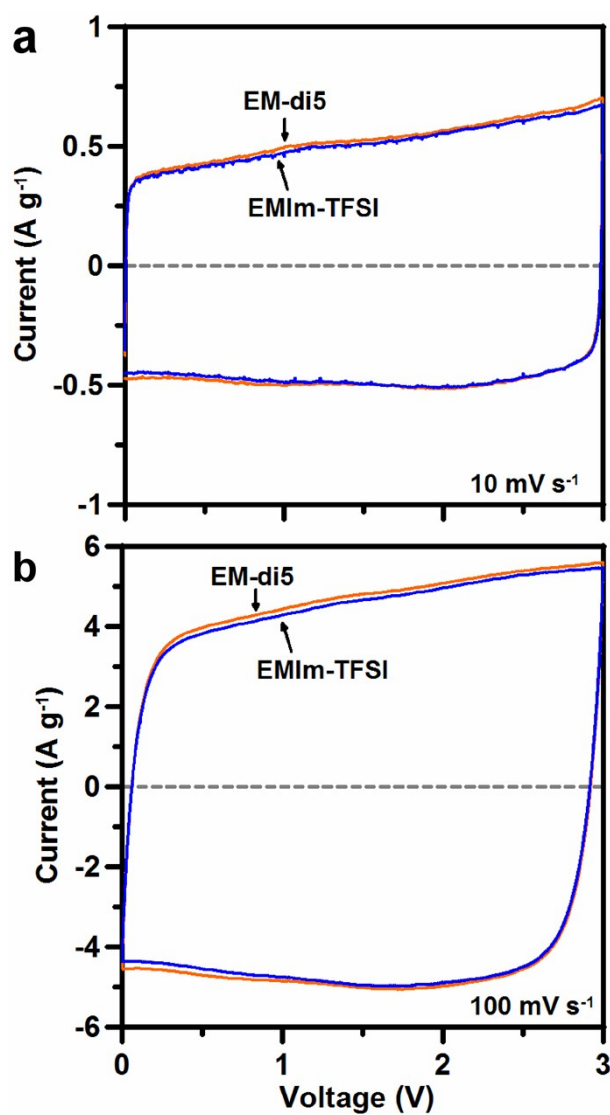

**Fig. S6.** Cyclic voltammograms of the EMIm-TFSI and EM-di5 EDLCs measured at 60 °C with scan rates of: (a) 10 mV s<sup>-1</sup>; (b) 100 mV s<sup>-1</sup>.

9. Capacitance values of the EMIm-TFSI and EM-di5 EDLCs measured at 60 °C

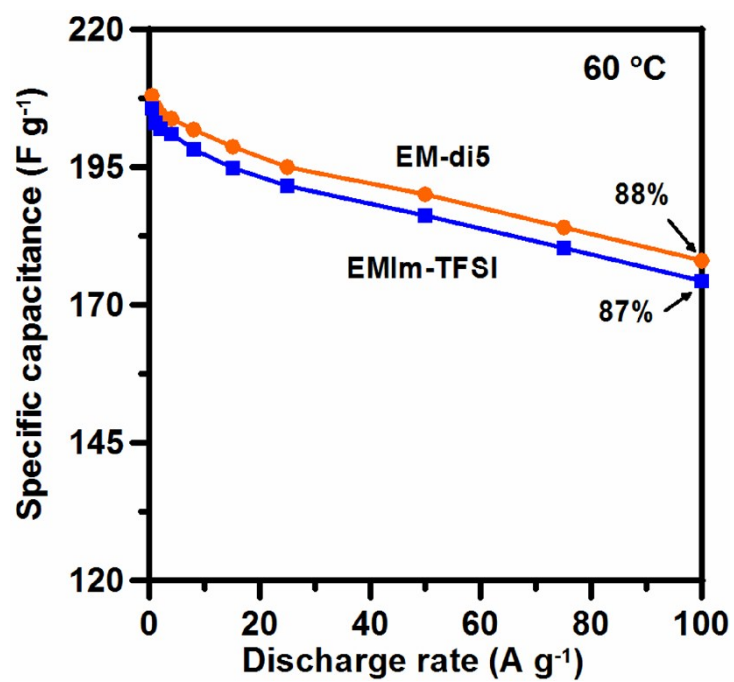

**Fig. S7.** The variation of the capacitance at 60 °C with discharge rate for the EMIm-TFSI and EM-di5 EDLCs.
